1                   **Utilising a Cohort Study of Hepatitis B Virus (HBV)**  
2                   **Vaccine-Mediated Immunity in South African**  
3                   **Children to Model Infection Dynamics:**  
4                   **Can We Meet Global Targets for Elimination by 2030?**

5  
6                   Anna McNaughton<sup>1\*</sup>, José Lourenço<sup>2\*</sup>, Louise Hattingh<sup>3\*</sup>, Emily Adland<sup>4</sup>,  
7                   Samantha Daniels<sup>3</sup>, Anriette Van Zyl<sup>3</sup>, Connie S Akiror<sup>5</sup>, Susan Wareing<sup>6</sup>,  
8                   Katie Jeffery<sup>6</sup>, Azim Ansari<sup>1</sup>, Paul Klenerman<sup>1,6</sup>, Philip J R Goulder<sup>4</sup>,  
9                   Sunetra Gupta<sup>2</sup>, Pieter Jooste<sup>3</sup>, Philippa C Matthews<sup>1,6\*</sup>

10  
11                   \* These three authors contributed equally to the work presented here

12  
13                   <sup>1</sup> Nuffield Department of Medicine, Peter Medawar Building for Pathogen Research, South  
14                   Parks Road, Oxford OX1 3SY, UK

15                   <sup>2</sup> Department of Zoology, Peter Medawar Building for Pathogen Research, South Parks  
16                   Road, Oxford OX1 3SY, UK

17                   <sup>3</sup> Department of Paediatrics, Kimberley Hospital, Kimberley, 8300, South Africa

18                   <sup>4</sup> Department of Paediatrics, Peter Medawar Building for Pathogen Research, South Parks  
19                   Road, Oxford OX1 3SY, UK

20                   <sup>5</sup> Global Healthcare Public Foundation, Makindu Lane, Kololo, Kampala, Uganda

21                   <sup>6</sup> Department of Infectious Diseases and Microbiology, Oxford University Hospitals NHS  
22                   Foundation Trust, John Radcliffe Hospital, Headley Way, Oxford OX3 9DU, UK

23  
24                   \* Corresponding author: [philippa.matthews@ndm.ox.ac.uk](mailto:philippa.matthews@ndm.ox.ac.uk)

25  
26  
27                   **RUNNING HEAD:** HBV vaccine responses and model of timescale to elimination

28  
29                   **KEYWORDS:** hepatitis b virus; HBV; HIV; co-infection; epidemiology; Africa; South Africa;  
30                   children; paediatrics; antibodies; vaccine; immunisation; elimination; transmission; dynamics;  
31                   model; simulation; vertical transmission; PMTCT; number needed to vaccinate; sustainable  
32                   development goals; public health

33  
34

35 **ABBREVIATIONS**

- 36 • HBcAg – Hepatitis B core antigen
- 37 • HBeAg – Hepatitis B envelope antigen
- 38 • HBsAg – Hepatitis B surface antigen
- 39 • Anti-HBc – antibody to hepatitis B core antigen (antibody mediated by exposure to
- 40 infection)
- 41 • Anti-HBe – antibody to hepatitis B envelope antigen
- 42 • Anti-HBs – antibody to hepatitis B surface antigen (vaccine-mediated antibody)
- 43 • ART – anti-retroviral therapy
- 44 • COSAC – coinfection in South African children
- 45 • EPI – Expanded Programme on Immunisation
- 46 • HBV – hepatitis B virus
- 47 • HIV – human immunodeficiency virus (type 1)
- 48 • KReC – Kimberley Respiratory Cohort
- 49 • PMTCT – prevention of mother to child transmission
- 50 • RTHB – Road to Health Book
- 51 • WHO – World Health Organisation

52

53

54 **ABSTRACT**

55 **Background:** Sustainable Development Goals and the World Health Organisation (WHO)  
56 Global health sector strategy on viral hepatitis have set a challenge for the elimination of  
57 hepatitis B virus (HBV) infection as a public health concern by the year 2030. Based on  
58 current estimates of 250 million individuals with chronic infection, an intensive scale-up of  
59 preventive interventions will be required to achieve this goal, alongside enhanced diagnosis  
60 and treatment. Although a safe, effective HBV vaccine has been part of the Expanded  
61 Programme on Immunisation since the mid-1990's, the extent to which enhanced  
62 immunization can contribute to these elimination targets is currently uncertain. We set out to  
63 characterise the epidemiology of HBV infection and the prevalence of vaccine-mediated  
64 protection in a cohort of South African children in order to inform a model of HBV  
65 transmission and prevention. This has allowed us to develop robust, evidence-based  
66 insights into the extent to which scaling up vaccination and prevention of mother-to-child  
67 transmission (PMTCT) might ultimately contribute to HBV elimination, and to assess the  
68 extent to which the targets for 2030 are realistic.

69

70 **Methods and findings:** We studied a cohort of 310 children (136 HIV-positive; 174 HIV-  
71 negative) aged 6-60 months in Kimberley, South Africa. We screened for HBV infection  
72 (HBsAg) and exposure (anti-HBc); these were each present in 3 children (<1% prevalence).  
73 A vaccine-mediated antibody (anti-HBs) titre  $\geq 10$  mIU/ml was present in 238/310 children  
74 (77%). The mean Anti-HBs titre in HIV-negative participants was significantly higher than  
75 among HIV-positive children ( $p < 0.0001$ ). Comparing the 136 HIV-positive children with an  
76 additional group of older children, also with HIV infection ( $n=92$ , age >60 months), we  
77 demonstrated significantly higher antibody titres in the younger group ( $p < 0.0001$ ). We used  
78 observations made in this cohort, alongside previous estimates of HBV transmission and  
79 epidemiology, and published population statistics for South Africa, to underpin a model for  
80 HBV infection dynamics. We used this model to investigate the influence of prevention  
81 strategies, focusing on vaccination and PMTCT. Current vaccination efforts can be predicted  
82 to reduce population prevalence by ~20% in the first 25 years, but can bring the prevalence  
83 of HBV e-antigen (HBeAg)-positive chronic carriers down by ~40% in the same time period.  
84 There is additional benefit in providing catch-up vaccination, with higher short-term impact  
85 but little long-term difference. Combining neonatal vaccination with robust PMTCT is the  
86 most effective population-level strategy to secure short-term impact, but coverage of both  
87 interventions needs to be high. Overall, the model demonstrates that with strategies and  
88 resources already available, sustained control with significant, positive public health impact  
89 is possible, although time to elimination is substantially longer than that proposed by current  
90 goals.

91

92 **Conclusions:** At the level of an individual cohort, these data reflect the substantial overall  
93 success of HBV immunisation, with <1% of children now becoming infected with HBV in an  
94 endemic setting, despite the high population prevalence of HIV infection. These findings  
95 endorse the existing efforts of vaccine campaigns in protecting individual children from  
96 chronic HBV infection. However, we go on to demonstrate that vaccination alone is not  
97 sufficient to eliminate this endemic virus; moreover, to move towards the target of  
98 elimination, major improvements in vaccination deployment and coverage are required, and  
99 enhanced efforts are required to provide diagnosis and treatment to antenatal women to  
100 prevent vertical transmission. Realistic targets, rather than focusing on a complete  
101 elimination of the public health threat posed by HBV by the year 2030, may be better aiming  
102 for a substantial reduction in prevalence, which will come about through vaccination,  
103 PMTCT, and reduction of HBeAg-positive carriage. The magnitude of the elimination  
104 challenge, and the long time periods of sustained investment that will be required, underline  
105 the crucial importance of parallel investment into diagnostics, advocacy, policy, education  
106 and ongoing research into HBV cure strategies.

## 107 INTRODUCTION

108 The World Health Organisation (WHO) has recently published strategies targeting the  
109 elimination of viral hepatitis as a major public health threat by 2030 (1,2). The magnitude of  
110 this challenge becomes apparent on reviewing the burden of mortality and morbidity  
111 attributed to these infections: overall, hepatitis viruses are responsible for an estimated 1.4  
112 million deaths annually. Of these, 47% are directly attributable to hepatitis B virus (HBV) (1),  
113 which is currently estimated to be responsible for chronic infection in 240-260 million  
114 individuals worldwide (3). The highest prevalence of HBV infection, frequently >8%, is  
115 reported in Africa and South East Asia (4), but African populations are under-represented in  
116 the current literature.

117  
118 In South Africa, HBV is endemic: the estimated prevalence among adults is 6-11% (4-6),  
119 with a disproportionately higher prevalence occurring in rural regions (7,8). Conventional  
120 parenteral transmission routes are well recognised, but a substantial proportion of infections  
121 in South Africa have traditionally been attributed to horizontal transmission within  
122 households during early childhood (9). In a recent study in Kimberley, we demonstrated  
123 cases of HBV infection among children with HIV (10), despite the inclusion of the HBV  
124 vaccination in routine childhood immunisation programmes in South Africa since 1995 (9).

125  
126 This vaccine, a safe and affordable recombinant surface antigen protein, has been available  
127 for several decades (11,12), and is highly efficacious, generating immunity to HBV in >90%  
128 of immunocompetent individuals after a primary course of three doses (11,13,14). Since the  
129 mid-1990s, the WHO has encouraged universal coverage of the HBV vaccine through its  
130 Expanded Programme on Immunisation (EPI) (15) and the majority of countries now offer  
131 three doses of HBV vaccination in infancy. Antenatal screening for HBV, to reduce the risk of  
132 vertical transmission, is also advocated by the WHO (16). The administration of the HBV  
133 vaccine and HBV immune globulin immediately after birth for babies born to HBV-positive  
134 mothers has been demonstrated to reduce the risk of vertical transmission to  $\leq 3\%$ , with high  
135 maternal HBV viral loads and HBV envelope antigen (HBeAg) positivity being risk factors for  
136 transmission despite prophylaxis (17).

137  
138 EPI guidelines recommend universal administration of the HBV vaccine, with advice being to  
139 provide the primary dose in the first day of life (3,18). However, there are several challenges  
140 to the success of this strategy. In South Africa, the first dose is conventionally delayed until  
141 age 6 weeks with subsequent doses at 10 and 14 weeks, leaving a window during which  
142 vertical transmission can occur peripartum or in the early weeks of life (19). Coverage of the  
143 third vaccine dose is difficult to ascertain with confidence; estimates for coverage in the first

144 year of life range from 56-97% (9). South Africa's high HIV prevalence (estimated 12.7%  
145 (20)) poses a further challenge to the success of national HBV initiatives, as being HIV  
146 positive can increase the risk of peripartum transmission of HBV, and the HBV vaccine has  
147 been demonstrated to have reduced efficacy in HIV positive individuals (21–24).

148

149 Vaccine modelling studies, which include 'number needed to vaccinate' (NNV) approaches,  
150 can be used to inform and advise on intervention strategies and to develop cost-benefit  
151 analyses for vaccination programmes (25). Such models are based on parameters that  
152 include vaccine efficacy, and the incidence, prevalence and transmission rates of a given  
153 infection (26). A recent modelling study has considered the contribution of vaccination  
154 towards the global elimination of HBV (27), but the broad approach and inclusion of  
155 vaccination as one of many potential interventions makes it difficult to single out the role and  
156 influence of immunisation. Although HBV is one of the most robust and widely used  
157 vaccines, to the best of our knowledge there is no specific HBV vaccine model in the  
158 published literature.

159

160 In order to investigate HBV vaccine coverage and vaccine-mediated immunity in South  
161 Africa, we set out to investigate HBV sero-epidemiology. We then used these data from one  
162 specific site to prime a model that illustrates HBV dynamics and transmission, providing us  
163 with a tool to investigate the impact of preventive interventions. The model allows us to  
164 assess the extent to which current elimination goals are realistic, and to develop an  
165 understanding of specific ways in which prevention strategies can be developed and  
166 improved, underpinning wise deployment of limited resources, and providing insights that  
167 inform our approach to the challenges of measuring progress - with the ultimate goal of  
168 elimination.

169

## 170 **MATERIALS AND METHODS**

### 171 **Ethics Approval**

172 Ethics approval for the study was obtained from the Ethics Committee of the Faculty of  
173 Health Science, University of the Free State, Bloemfontein, South Africa (HIV Study Ref:  
174 ETOVS Nr 08/09 and COSAC Study Ref: ECUFS NR 80/2014). Written consent for  
175 enrolment into the study was obtained from the child's parent or guardian.

176

### 177 **Study cohort**

178 Children were recruited as part of the Co-infection in South-African Children (COSAC) study,  
179 in Kimberley, South Africa, as previously described (10,28). We set the lower age limit of  
180 recruitment as 6 months in order to limit the detection of maternal anti-HBs in younger

181 infants, and the upper limit at 60 months in order to optimise the capture of hand-held  
 182 vaccine records (Road to Health Book, RTHB) carried by children aged under 5. These  
 183 children were recruited from two sources:

- 184 i. HIV-negative participants (n=174), recruited through the Kimberley Respiratory  
 185 Cohort (KReC) as previously described (28). These children were admitted to  
 186 hospital with a clinical diagnosis of respiratory tract infection between July 2014 and  
 187 August 2016. The majority of KReC children were routinely HIV-tested as a  
 188 component of their clinical assessment, and were confirmed HIV-negative in 163  
 189 cases (93.7%). A further 11 children did not have an HIV test result recorded, but  
 190 were assumed to be HIV-negative for the analysis based on the clinical data that  
 191 were available at the time of admission to hospital.
- 192 ii. HIV-positive children (n=136) recruited primarily from HIV outpatient clinics,  
 193 (recruited between September 2009 and July 2016). This includes five children who  
 194 were recruited into the KReC study but subsequently tested HIV-positive. For HIV-  
 195 positive children, we recorded date of commencement of ART (anti-retroviral  
 196 therapy), CD4+ T cell count, CD4+ T cell percentage, and HIV RNA viral load, when  
 197 these data were available. We recorded these information using the time point  
 198 closest to the sample that was analysed for HBV serology.

199  
 200 In order to study the influence of age on vaccine-mediated responses, we also collected data  
 201 from a third group of older HIV-positive children (age >60 months, range 64-193 months,  
 202 n=92) as previously described (10,28). Where possible, we recorded the number of HBV  
 203 vaccine doses received based on the RTHB. At the time of undertaking this study, children  
 204 were immunised with three doses of a monovalent HBV vaccine (Biovac Paed). The  
 205 characteristics of the cohorts are summarised in table 1 and all metadata can be found in  
 206 Suppl. data 1.

207  
 208 **Table 1: Characteristics of three paediatric study cohorts, comprising 402 children,**  
 209 **recruited from Kimberley Hospital, South Africa.**

| Cohort                                | HIV negative;<br>KReC<br>(age ≤60 months) | HIV positive<br>(age ≤60 months) | HIV positive<br>(age >60 months) |
|---------------------------------------|-------------------------------------------|----------------------------------|----------------------------------|
| <b>Number of subjects</b>             | 174                                       | 136                              | 92                               |
| <b>Age range in months</b>            | 8-58                                      | 6-60                             | 64-193                           |
| <b>Median age in<br/>months (IQR)</b> | 18 (12-26)                                | 29 (18-40)                       | 137 (122-154)                    |
| <b>Sex (% male)</b>                   | 55.4                                      | 44.9                             | 45.6                             |

210 KReC = Kimberley Respiratory Cohort. IQR = interquartile range.

211

### 212 **Laboratory assessment of HBV status**

213 Testing for Hepatitis B serum markers and DNA was performed as previously described; for  
214 HIV-positive children this is in keeping with recent implementation of HBV screening in  
215 Kimberley (10). Briefly, HBsAg testing was carried out in Kimberley Hospital, South Africa  
216 using the Magnetic parcel chemiluminometric immunoassay (MPCI; Advia Centaur platform).  
217 Confirmatory HBsAg testing was carried out by the UKAS accredited clinical microbiology  
218 laboratory at Oxford University Hospitals (OUH) NHS Foundation Trust, Oxford, UK  
219 (Architect i2000). For all samples, anti-HBs and anti-HBc testing were carried out by the  
220 OUH laboratory (Architect i2000). Limit of detection of the anti-HBs assay was 10 mIU/ml.

221

### 222 **Setting a threshold for vaccine mediated immunity**

223 In practice, a threshold for vaccine-mediated immunity is difficult to define, and studies  
224 variably quote anti-HBs titres of  $\geq 10$  mIU/ml or  $\geq 100$  mIU/ml as a correlate of protection. UK  
225 recommendations for testing HBV immunity often rely on the more stringent criterion of an  
226 anti-HBs titre of  $\geq 100$  mIU/ml (29). However, early vaccine studies have highlighted that a  
227 titre of  $\geq 10$  mIU/ml is likely to be a clinically relevant threshold for protection; a study of  
228 children in The Gambia showed that children who attained an anti-HBs titre of  $\geq 10$  mIU/ml  
229 were most likely to be immune (30), and another study demonstrated increased risk of  
230 infection when antibody titres fell  $< 10$  mIU/ml (31). Due to the varying use of different  
231 thresholds, we have presented our results pertaining to both thresholds of  $\geq 10$  mIU/ml and  
232  $\geq 100$  mIU/ml.

233

### 234 **Statistical analysis**

235 Data from the cohort was analysed using GraphPad Prism v.7.0. We determined significant  
236 differences between sub-sets within the cohort using Mann-Whitney U tests for non-  
237 parametric data, Fisher's exact test for categorical variables and correlation between data  
238 points was assessed using Spearman's correlation coefficient. We calculated multi-variable  
239 analysis by logistic regression using the Statistics add-on tool in Google Sheets  
240 (<https://www.google.co.uk/sheets/about/>).

241

### 242 **Model of HBV transmission and prevention**

243 A mathematical model of HBV transmission was developed using ordinary differential  
244 equations. The model is represented schematically in Fig 1A. We consider the population  
245 grouped into categories as follows:

- 246 • **Susceptible** (S); sub-divided into three age groups, representing infants ( $S_i$ , <1 yr of  
247 age), children ( $S_c$ , age 1-6 yrs) and older children and adults ( $S_a$ , >6 years of age);
- 248 • **Carriers** (C); sub-divided into three groups represented as acute infections  
249 (designated I), chronic e-antigen positive (HBeAg+, designated C+) and chronic e-  
250 antigen negative (HBeAg-, designated C-);
- 251 • **Recovered** (R); individuals who have been infected but cleared, rendering them  
252 immune.
- 253 • **Vaccinated** (V); individuals who have received a full vaccine schedule and are  
254 assumed to have protective titres of vaccine-mediated anti-HBs.

255

256 We used the mid-year population estimates from 2016 published by Statistics South Africa  
257 (20) to determine demographic data about life expectancy, fertility rate and infant mortality.  
258 Alongside all other parameter descriptions and references, these details can be found in  
259 suppl. data 2.

260

261 Depending on age at infection, individuals could either sustain an acute infection (I) or  
262 become carriers (C), as represented by the age-specific parameters  $\gamma$ ,  $\psi$ ,  $\epsilon$  for  $S_i$ ,  $S_c$  and  $S_a$   
263 respectively. Chronic carriers were assumed to be initially HBeAg+ (C+), but could convert  
264 to HBeAg- (C-) at rate  $\theta$ , and eventually clear infection at a rate  $\rho$ . We assumed that acute  
265 (I) and HBeAg+ carriers (C+) had a higher transmission potential than acute and HBeAg-  
266 carriers. Depending on the infection status of mothers, individuals could be born susceptible  
267 (represented by an input of Z into the  $S_i$  class) or be infected at birth (represented by an  
268 input of W into the C+ class). Population size is constant with equal births (b) and deaths ( $\mu$ ),  
269 with HBeAg+ individuals having a shorter lifespan ( $1/\mu'$ ) than the rest of the population.  
270 Acutely infected individuals were assumed to enter a recovered class, R, at a rate  $\sigma$ .

271

272 Intervention strategies were considered in the model in the form of reductions in vertical  
273 transmission (affecting W and Z), and routine and catch-up vaccination (moving individuals  
274 to class V). Routine vaccination could take place at birth (with a proportion Z' entering class  
275 V) or effectively within the adult population (as a proportion  $V_a$  of those leaving  $S_c$  entering  
276 class V). Catch-up vaccination was modelled by moving a proportion of susceptible  
277 individuals in every age class into the vaccinated class in a single time event (not shown in  
278 diagram).

279

280 The modelling approach is subdivided into three main steps: (i) fitting to demographic and (ii)  
281 transmission backgrounds, followed by the (iii) simulation of single or combined



282 interventions. In the first two steps we effectively fit unknown model parameters ( $a$ ,  $c$ ,  $\beta$ ,  $\rho$ ,  $\theta$ )  
 283 to population-based observations using a Bayesian Markov-Chain Monte-Carlo (MCMC)  
 284 approach. After obtaining posteriors for these parameters, we set them to the obtained  
 285 medians before numerically simulating interventions. Full model details, fitting output, as well  
 286 as other results and sensitivity experiments are presented in suppl. data 2.

287

## 288 RESULTS

### 289 Serological evidence of exposure to HBV infection

290 Evidence of current infection with HBV, determined by the detection of HBsAg, was  
 291 observed in three children (0.8% of the cohort; table 2). None of these three children  
 292 attended with a written vaccination record (RTHB). Anti-HBc was detected in 0.8% subjects  
 293 ( $n=3$ ), one of whom was also HBsAg positive. The other two participants were HBsAg  
 294 negative, indicating previous exposure to HBV infection and likely viral clearance in these  
 295 subjects.

296

297 **Table 2: Detailed information and serological profiles of five children from Kimberley,**  
 298 **South Africa, with serological evidence of current or previous infection with HBV**  
 299 **(based on positive HBsAg ( $n=3$ ) or anti-HBc ( $n=2$ ))**

| Subject                                  | K306                                        | K405                                       | KReC51          | KReC151         | K093                                    |
|------------------------------------------|---------------------------------------------|--------------------------------------------|-----------------|-----------------|-----------------------------------------|
| <b>Cohort</b>                            | HIV-<br>positive<br>age $\leq 60$<br>months | HIV<br>positive<br>age $\leq 60$<br>months | KReC            | KReC            | HIV<br>positive<br>age $> 60$<br>months |
| <b>Sex</b>                               | F                                           | F                                          | F               | M               | F                                       |
| <b>Age (months) at time of sampling</b>  | 18                                          | 37                                         | 20              | 15              | 118                                     |
| <b>HIV infection</b>                     | Positive                                    | Positive                                   | Negative        | Negative        | Positive                                |
| <b>ART<sup>a</sup> (if HIV positive)</b> | Yes                                         | Yes                                        | n/a             | n/a             | No                                      |
| <b>Number of doses of HBV vaccine</b>    | NK                                          | NK                                         | NK              | 3               | NK                                      |
| <b>HBsAg result<sup>b</sup></b>          | <u>Detected</u>                             | <u>Detected</u>                            | <u>Detected</u> | Not detected    | Not detected                            |
| <b>Anti-HBc result<sup>c</sup></b>       | Not detected                                | Not detected                               | <u>Detected</u> | <u>Detected</u> | <u>Detected</u>                         |
| <b>HBeAg result<sup>d</sup></b>          | Not done                                    | Not done                                   | <u>Detected</u> | Not done        | Not done                                |
| <b>Anti-HBs result<sup>e</sup></b>       | Not detected                                | Not detected                               | Not detected    | <u>Detected</u> | Not detected                            |
| <b>Interpretation</b>                    | Active                                      | Active                                     | Active          | Immunised,      | Infected                                |

infection      infection      infection      infected and  
cleared      and  
cleared

300 <sup>a</sup>ART indicates the participant was receiving anti-retroviral therapy to treat HIV infection;  
301 <sup>b</sup>Hepatitis B surface antigen test; <sup>c</sup>Hepatitis B core antibody test; <sup>d</sup>Hepatitis B envelope  
302 antigen test; <sup>e</sup>Hepatitis B surface antibody test (vaccine mediated response). KReC =  
303 Kimberley Respiratory Cohort. n/a = not applicable.

304

### 305 **Documented evidence of vaccination and serological evidence of immunity to HBV in** 306 **children aged ≤60 months**

307 We were able to collect written documented evidence of immunisations from the RTHB in  
308 90.8% HIV negative (KReC) subjects but only from 6.3% of HIV positive subjects. This  
309 means that in the absence of a detectable anti-HBs titre, we cannot reliably distinguish  
310 children who are immunised but fail to mount an antibody response from children who are  
311 unimmunised. Among children with an RTHB record, 81.3% of HIV-negative and 100% of  
312 HIV-positive subjects were recorded as having received three primary doses of the HBV  
313 vaccine as stipulated by the EPI.

314

315 Across the whole cohort age 6-60 months, 238/310 children (77%) had an anti-HBs titre ≥10  
316 mIU/ml suggesting some degree of vaccine-mediated immunity. The median anti-HBs titre  
317 in HIV-negative participants was significantly higher than among HIV-positive children (196.1  
318 mIU/ml, vs. 11.1 mIU/ml, respectively,  $p < 0.0001$ ) (Fig 2A). No detectable anti-HBs titre was  
319 detected for 3.4% of HIV-negative individuals, vs. 47.8% of HIV-positive subjects  
320 ( $p < 0.0001$ ). Irrespective of the antibody titre used as a threshold for immunity, anti-HBs was  
321 higher in HIV-negative compared to HIV-positive children (Fig 2B, C). We found no  
322 significant difference in the anti-HBs titres between male and female participants, either with  
323 or without HIV infection (data not shown).

324

### 325 **Waning of vaccine response with age**

326 In order to explore the influence of age on titres of vaccine-mediated immunity, we compared  
327 the ages of children who achieved anti-HBs ≥100mIU/ml vs those who did not reach this  
328 threshold, considering HIV-positive and HIV-negative groups separately. Among HIV-  
329 positive children, those with protective antibody titres were significantly younger than those  
330 not reaching this threshold (median age 17 months vs. 31 months,  $p = 0.0008$ ; Fig 3A). No  
331 such difference was observed within the HIV-negative group (Fig 3B). Using a threshold of  
332 ≥10mIU/ml, no significant differences were observed in the anti-HBs responses of either the  
333 HIV-positive or the HIV-negative groups (data not shown). To expand our view of the HIV-  
334 positive group, we also added analysis of an older cohort (92 children aged >60 months),

335 and demonstrated that anti-HBs titres were significantly lower in this older group ( $p < 0.0001$ ),  
336 with only 2/92 subjects (2.2%) achieving a detectable anti-HBs titre of  $\geq 10$  mIU/ml (Fig 3C).

337

338 Anti-HBs titres waned significantly with age up to age 60 months in HIV-positive children (Fig  
339 3D) ( $p = 0.004$ ). No correlation was identified in the HIV-negative cohort (data not shown,  
340  $p = 0.174$ ), but a trend towards a decline was evident over time (Fig 3E).

341

### 342 **Stratification of vaccine responses by anti-retroviral therapy (ART) among HIV-** 343 **positive children**

344 For children aged 6-60 months, we recorded whether or not study participants were treated  
345 with ART; this information was available for 79% of subjects. Among these, 71% of HIV-  
346 positive study participants were known to be receiving anti-retroviral therapy (ART) at the  
347 time of testing for anti-HBs. These children had been treated with ART for varying lengths of  
348 time (median 20 months; IQR 6-33 months).

349

350 We compared anti-HBs titres of subjects being treated with ART compared to those not  
351 currently receiving ART and found no significant difference ( $p = 0.72$ ; 76 children on ART,  
352 median anti-HBs 13.3 mIU/ml and 31 children not on ART, median anti-HBs 14.1 mIU/ml).  
353 There was also no difference between anti-HBs titres of children on ART for  $\leq 12$  months  
354 compared with those treated for  $> 12$  months (data not shown). We did not examine the  
355 effect of ART on anti-HBs titres in children  $> 60$  months old due to the low numbers of  
356 subjects in this group with a detectable anti-HBs titre ( $n = 2$ ).

357

### 358 **Multivariate analysis**

359 In a multivariate analysis, two factors were identified as predictive of a protective anti-HBs  
360 titre: age  $< 24$  months and HIV-negative status (table 3).

361

362 **Table 3: Multivariate analysis to identify factors associated with anti-HBs titre**  
363  **$\geq 100$  mIU/ml among HIV-positive and HIV-negative children aged 6-60 months from**  
364 **Kimberley, South Africa.** Percentages shown represent the proportion of the entire cohort  
365 ( $n = 310$ ) who fall into the listed category.

366

| Characteristic | Proportion of group<br>with anti-HBs<br>titre $< 100$ mIU/ml (%) | Proportion of group<br>with anti-HBs titre<br>$\geq 100$ mIU/ml (%) | P-<br>value |
|----------------|------------------------------------------------------------------|---------------------------------------------------------------------|-------------|
|----------------|------------------------------------------------------------------|---------------------------------------------------------------------|-------------|

|                          |      |      |          |
|--------------------------|------|------|----------|
| <b>Age &lt;24 months</b> | 21.2 | 32.5 | 0.005    |
| <b>Sex (Male)</b>        | 27.4 | 22.9 | 0.276    |
| <b>HIV (negative)</b>    | 16.9 | 39.8 | < 0.0001 |

367

368 Among HIV-positive children age 6-60 months, CD4+ T-cell counts and HIV viral load were  
 369 available for 83% of participants (suppl. data 1). We included age, sex, CD4+ T-cell counts,  
 370 CD4+ T-cell proportion and HIV viral load in a multivariate analysis for protective anti-HBs  
 371 responses (table 4). In this model, age <24 months and HIV viral load  $\leq 2.0 \log_{10}$  were found  
 372 to be predictors of an anti-HBs titre of  $\geq 100$  mIU/ml. Multivariate analysis using the lower  
 373 anti-HBs titre of  $\geq 10$  mIU/ml identified only HIV-negative status as a significant association.

374

375 **Table 4: Multivariate analysis for factors associated with anti-HBs titre  $\geq 100$  mIU/ml in**  
 376 **HIV-positive children age 6-60 months from Kimberley, South Africa.** Percentages  
 377 shown represent the proportion of the entire cohort (n=136) who fall into the listed category.

378

| <b>Characteristic</b>                        | <b>Proportion of group<br/>with anti-HBs titre<br/>&lt;100 mIU/ml (%)</b> | <b>Proportion of group<br/>with anti-HBs titre<br/><math>\geq 100</math> mIU/ml (%)</b> | <b>P-value</b> |
|----------------------------------------------|---------------------------------------------------------------------------|-----------------------------------------------------------------------------------------|----------------|
| <b>Age (&lt;24 months)</b>                   | 21.1                                                                      | 8.3                                                                                     | 0.048          |
| <b>Sex (Male)</b>                            | 40.3                                                                      | 4.7                                                                                     | 0.432          |
| <b>Treatment (ART)</b>                       | 54.3                                                                      | 12.9                                                                                    | 0.568          |
| <b>CD4+ count (&lt;1000)</b>                 | 33.6                                                                      | 4.7                                                                                     | 0.954          |
| <b>CD4+ (&lt;30%)</b>                        | 52.4                                                                      | 5.7                                                                                     | 0.462          |
| <b>Viral load (&lt;2.0 log<sub>10</sub>)</b> | 18.5                                                                      | 5.6                                                                                     | 0.045          |

379

#### 380 **Odds of developing an anti-HBs response**

381 An odds ratio (OR) analysis (Figure 4) indicated that being HIV-positive was associated with  
 382 reduced odds of developing protective anti-HBs titres, based on titres of both  $\geq 10$  mIU/ml  
 383 (OR 26.2, 95% CI 11.2-58.6) and  $\geq 100$  mIU/ml (OR 11.6, 95% CI 6.7-20.4). Younger age

384 (<24 months) increased the odds of having an anti-HBs titre of  $\geq 10$  mIU/ml (OR 0.3, 95% CI  
385 0.2-0.5) or  $\geq 100$  mIU/ml (OR 0.3, 95% CI 0.2-0.4). Among the HIV-positive subjects only,  
386 age <24 months only elevated the odds for developing an anti-HBs response of  $\geq 100$  mIU/ml  
387 (OR 0.1, 95% CI 0.06-0.4) (Figure 4B). Other characteristics analysed including gender,  
388 ART, CD4+ count, CD4+ ratio and HIV viral load were not found to be significantly predictive  
389 of anti-HBs titres at either threshold.

390

### 391 **Modelling effects of interventions on HBV prevalence**

392 We fitted the transmission model (Figure 1A) to demographic and transmission observations  
393 specific to Kimberley, South Africa, Bayesian Markov-chain Monte-Carlo method (see details  
394 in Suppl. Data 2). We simulated several scenarios of vaccination and PMTCT interventions  
395 deployed first singly (Fig 1 B/C), and then in combination (Fig 5), quantifying 'impact' as  
396 reduction in total HBsAg or HBeAg prevalence, and estimating time for prevalence to reach  
397 levels for which stochastic extinction would be highly likely.

398

399 Figure 1B illustrates how increasing the proportion of infants given birth vaccination has a  
400 progressive impact on reducing the population prevalence of HBV infection. Importantly,  
401 even with complete coverage of neonates, prevalence is shown to approach zero only after  
402 400 years. These long time-scales are in keeping with an intervention that does not tackle  
403 the large established reservoir of chronic infection and targets only a small proportion of the  
404 population such that vaccine-induced herd-immunity accumulates slowly over several  
405 decades (Figure S6). For similar reasons, implementing robust PMTCT (Fig 1C) would also  
406 slowly reduce HBV prevalence, but since it does not prevent infection later in life, PMTCT on  
407 its own would have a smaller overall impact than neonatal vaccination.

408

409 Having illustrated the impact of these single interventions at a population level, we next used  
410 our model to explore the impact of combined interventions, considering vaccination of  
411 neonates together with older ages (Fig 5 panels ABCD-1), neonatal vaccination together  
412 with PMTCT (Fig 5 panels ABCD-2), and neonatal vaccination together with PMTCT plus  
413 100% catch-up vaccination of all ages (Fig 5 panels ABCD-3).

414

415 We first addressed how different combinations of interventions would impact HBV  
416 epidemiology in terms of the time required to reduce total prevalence to 0.1% (Fig 5 panels  
417 A1-3). Combining immunization of neonates with older ages (>6 years) required the longest  
418 time (Fig 5 A1), with improvements seen when combining neonatal vaccination with PMTCT  
419 (Fig 5 A2), and shortest periods observed when combining the latter with a one off 100%  
420 catch-up of susceptible individuals (Fig 5 A3). In each of these scenarios, reaching 0.1%

421 prevalence took >200 years, even under full coverage. However, total prevalence may be  
422 reduced to 1% (~8 times lower than the level of endemicity before interventions), on much  
423 shorter timescales (50 yrs) when neonatal vaccination and PMTCT are combined (Fig S10).

424

425 After 25 years, based on a current rate of ~75% vaccination coverage in neonates only  
426 (mean of estimated 56-97%), the model predicts a total reduction in prevalence of ~19%  
427 relative to the pre-vaccination era (Fig 5 B1-2). If coverage were to be maintained at a stable  
428 95%, impact would be slightly higher with a reduction of 23% (Fig 5 B1-2). The addition of  
429 vaccination in older ages (>6 years old) was seen not to add much to this figure (Fig 5 B1).  
430 However, PMTCT was seen as highly beneficial, with a combination of 75% reduction in  
431 vertical transmission and current neonate coverage achieving 30% reduction in total  
432 prevalence (Fig 5 B2). With both interventions being effective at 95%, prevalence could have  
433 been reduced by 35%. If vaccination of neonates and PMTCT at 95% had been coupled with  
434 an extra catch-up campaign to immunise 100% of the susceptible population, prevalence  
435 would be reduced by 43% (Fig 5 B3). The impact of catch-up vaccination was highest in the  
436 short and mid-term, but slowed down thereafter.

437

438 In considering the overall impact of any intervention, HBeAg+ individuals are the group with  
439 the highest public health importance as these present the highest risk of chronic liver  
440 disease, including cancer, and high risk of both horizontal and vertical transmission. We  
441 found that under current vaccination coverage of 75% of neonates, HBeAg+ carriers could  
442 be reduced by 41% in 25 years (Fig 5 D1-2); and, had coverage been 95%, a reduction up to  
443 49% would have been possible. As observed for total prevalence, combining vaccination of  
444 neonates with older ages created minimal additional impact (Fig 5 D1). PMTCT, on the other  
445 hand, increased the impact of neonatal vaccination alone, with a reduction of 49% predicted  
446 for a combination of current 75% vaccination efforts and 50% reduction in vertical  
447 transmission. If both interventions had been maintained at 95%, the HBeAg+ carriers could  
448 have been reduced by a substantial 75% in only 25 years. As seen before for total  
449 prevalence, combining vaccination of neonates with PMCTC and a catchup of 100% would  
450 have generally increased impact (Fig 5 D3).

451

452 In conclusion, the model demonstrates long time-scales (decades or centuries) to bring  
453 about changes in population prevalence of HBV infection based on vaccination of infants,  
454 while catch-up vaccination of older age groups does not have a substantial impact. However,  
455 combining interventions can have additive effects, and the enhanced influence of key  
456 interventions on the high risk HBeAg+ population suggests more cause for optimism.

457

458 **DISCUSSION**

459 The work presented here is an important foundation for informing strategies that will move us  
460 towards the HBV targets enshrined within Sustainable Development Goals and Global  
461 Hepatitis Health Sector Strategy (2). With ambitious aims set out to be achieved by 2030, it  
462 is crucial that existing resources are deployed in the best possible way, based on a clear  
463 understanding of the likely scale and timeline for an impact to be evident at population level.  
464 While being optimistic about the improvements we can make in reducing population  
465 prevalence of HBV infection, a clear assessment of the challenge ahead is important  
466 advocacy for the development of new approaches, with the ultimate long-term aim still being  
467 HBV cure.

468

469 Studying a cohort of South African children demonstrates the potent effect of vaccination  
470 within individual communities: the observation that current and past HBV infections are  
471 infrequent in these children (both <1%) is in keeping with other studies that report a  
472 substantial decline in prevalence since universal infant HBV vaccination was introduced  
473 (22,32). A substantial proportion of HBV transmission in Africa is thought to arise before the  
474 age of 5 years (33) and these results are therefore encouraging in demonstrating that  
475 vaccination – when deployed correctly - is indeed reducing HBV incidence in early  
476 childhood, when the risk of developing chronic infection is at its highest. Although previous  
477 studies in the region have indicated that HBV infection is not significantly associated with  
478 HIV status (19,21,34), our data do highlight a likely additional vulnerability of HIV-infected  
479 children based on lower antibody titres, and a rapid wane to below the threshold of anti-HBs  
480 <10 mIU/mL that is associated with protection.

481

482 HBV vaccination is given in South Africa at 6, 10, and 14 weeks; this provides a window of  
483 opportunity for perinatal HBV transmission (10,19). This is illustrated particularly by one  
484 subject within our cohort (KREC-151), an HIV-negative child with serologic evidence of past  
485 infection with HBV, despite documentation of the three-dose HBV vaccination schedule and  
486 anti-HBs titre of 201.8 mIU/ml. Perinatal transmission can be significantly reduced by the  
487 implementation of antenatal screening for HBV and the administration of a birth dose  
488 vaccine (35) supplemented with anti-HBV immunoglobulin, although this intervention may  
489 not be affordable in resource-limited settings (36). In the case of KREC-151, it seems most  
490 likely that vaccination occurred after infection with HBV had already been established.  
491 Systematic efforts to deliver the first vaccine dose soon after birth (in keeping with EPI  
492 recommendations) could reduce such transmission events, even in settings where HBV  
493 immune globulin is not routinely available.

494

495 **Vaccine-mediated immunity to HBV**

496 Anti-HBs seroprevalence was significantly lower in HIV-positive participants when compared  
497 to HIV-negative subjects, irrespective of the threshold set for a protective titre. There are two  
498 possible explanations for this observation. First, impaired vaccine responses have previously  
499 been observed in HIV-positive individuals (22,37–40). However, given the lack of RTHB data  
500 for the HIV-positive study participants, we cannot exclude the second possibility, that  
501 coverage with the primary HBV vaccine course was lower among these children. This would  
502 be in keeping with a previous report that children born to HIV positive parents in South Africa  
503 are less likely to complete childhood vaccination programs (41).

504

505 Protective anti-HBs titres in HIV-positive subjects were significantly more frequent in  
506 subjects <24 months of age than in older subjects. This difference was not identified in the  
507 HIV-negative cohort and suggests that the vaccine responses in HIV-positive subjects wane  
508 rapidly after immunisation. This waning has been previously reported in both HIV-positive  
509 and HIV-negative subjects (32,37). However, loss of the anti-HBs response does not  
510 necessarily correlate with loss of clinical protection and anamnestic responses, where anti-  
511 HBs titre is very low or absent but immunological memory remains, are thought to occur in a  
512 proportion of those vaccinated (42), although this memory may be attenuated in the context  
513 of HIV (43,44).

514

515 We found no difference in anti-HBs titres between participants on ART and those not on  
516 ART, although there are previous reports correlating ART with improved HBV vaccine  
517 responses (24,45). A previous study of Kimberley children demonstrated that recovery of  
518 CD4+ T cell percentage in HIV-positive children takes a median of five years after initiation  
519 of treatment (46); our current study is therefore likely to be underpowered to detect any true  
520 effect, given both the relatively short durations of ART treatment, and the small number of  
521 children not receiving ART. Interestingly, despite the lack of correlation between anti-HBs  
522 responses and treatment with ART, we did find that children with lower HIV viral loads had  
523 significantly higher anti-HBs titres, in keeping with previous studies (45,47). Based on  
524 current treatment guidelines, all HIV-infected children are now started on ART (48) and the  
525 immune reconstitution of this population over time should be anticipated to reduce the  
526 differences in vaccine responses between HIV-positive and HIV-negative groups.

527

528 **HBV model**

529 The model we have generated appears to perform robustly based on the population  
530 parameters we have included for this population, and we believe this is a novel and  
531 important tool for adding to our understanding about transmission dynamics and potential



532 interventions for HBV. The determinants of an equilibrium in any population depend on a  
533 number of factors, which are determined by characteristics and behaviours of the host  
534 population (49) as well as potentially by the genetics of the virus. However, where the  
535 relevant epidemiological parameters have been defined, we believe the model could robustly  
536 be applied to other settings to explore the impact of interventions.

537

538 Based on the output from the model, we can demonstrate that targets for 'eliminating viral  
539 hepatitis as a major public health threat by 2030' are unlikely to be met, unless there is a  
540 major scaling up of both vaccination and PMTCT efforts. These two interventions  
541 implemented together, with a focus on neonatal vaccination, offer the best chances of  
542 making a significant impact on population prevalence. Perhaps more importantly, the  
543 predicted impact is greatest among HBeAg+ carriers, who are at an elevated risk of chronic  
544 liver disease and hepatocellular carcinoma, as well as being at higher risk of transmission,  
545 and therefore constitute the bulk of the public health burden of HBV.

546

547 The model illustrates long time-lines, enumerated in centuries rather than decades, for  
548 possible elimination. Although our population data demonstrate a substantial reduction in  
549 prevalence of HBV infection in children under the age of five years, which is likely to rest  
550 almost entirely on the success of the EPI delivery of HBV vaccination, this intervention is  
551 tackling only a small fraction of the total population. As HBV is already endemic, is often  
552 clinically silent, and may persist in infected carriers for decades (possibly for a life-time), the  
553 time-scale for elimination is long. However, the results of our simulations underscore that we  
554 can have a major public health impact even without achieving elimination. Careful adjusting  
555 of expectations and aims, according to the scale on which particular changes occur, may  
556 inform the setting of realistic targets (e.g. reduction in the prevalence of HBeAg+ carriers  
557 could be a useful outcome measure when assessing the impact of interventions across a  
558 population). The wrong choice of target and timescale could result in unnecessary  
559 abandonment of a strategy that could have a major impact in a few decades.

560

561 In conclusion, for all simulated combinations of interventions, the model demonstrates that  
562 elimination can only occur on very long time-scales. In the context of single interventions,  
563 vaccination in neonates was confirmed as the intervention resulting in highest impact,  
564 followed by PMCTC and vaccination in older ages (>6 years). When interventions were  
565 combined, the best approach was PMCTC with vaccination of neonates. A catchup campaign  
566 was demonstrated to be beneficial, but our simulations suggest that for realistic catchup  
567 coverages the added value would be minimal.

568

569 **Caveats and limitations**

570 There are a number of caveats that should be considered when analysing and interpreting  
571 the clinical dataset. Different approaches to recruitment of HIV-positive and HIV-negative  
572 children may introduce unintentional bias or confounders. Using respiratory admissions to  
573 hospital for the KReC cohort provided us with an important opportunity to identify a sufficient  
574 number of children quickly, and to acquire blood samples from children who would already  
575 be undergoing venepuncture as part of their routine clinical care. However, this approach to  
576 recruitment predominantly selected younger children (on average 9.4 months younger than  
577 the HIV-positive cohort). This bias towards younger subjects in the HIV-negative group, gave  
578 us less data with which to assess waning of the anti-HBs response among these children  
579 with age. The KReC children may also be less healthy than a comparable group of HIV-  
580 negative children in the community.

581

582 When designing the study, we elected to focus on children aged under age 60 months in  
583 order to collect data from the RTHB which is not routinely carried by older children. In  
584 practice, however, we did not capture good RTHB data from the HIV-positive group who  
585 frequently did not bring this record to their clinic visits. Data collection from the RTHB is itself  
586 subject to bias, as families who attend with such records may be those who are most likely  
587 to have immunised their children, while those for whom data are missing could represent the  
588 families in which children have missed vaccine doses.

589

590 Our approach to screening for HBV infection in this population is limited by undertaking an  
591 HBsAg assay. A more robust assessment, capturing cases of occult infection, would require  
592 use of HBV DNA as a screening tool. In practice, this is too expensive for wide-spread  
593 deployment and was not practical for this study on the same grounds. The lack of  
594 understanding about the biological correlates of HBV-vaccine mediated immunity is another  
595 challenge. On pragmatic grounds, we have presented data for anti-HBs thresholds of both  
596  $\geq 10$  mIU/ml and  $\geq 100$  mIU/ml. In the long-term, better understanding of the correlates of  
597 protective immunity are required to tailor vaccine strategies to individuals or cohorts. Recent  
598 data suggest that the site of immunization, diurnal timing of vaccine doses, and time of day  
599 when samples are collected may also have significant impact on antibody titres (50),  
600 although existing data for HBV vaccine do not support this (51). In this study, we did not set  
601 out to capture these data, but they might be pertinent for future studies. We have also not  
602 addressed issues such as maintenance of the cold-chain and vaccine storage which can  
603 also influence efficacy. Finally, vaccine efficacy may be determined by the vaccine received;  
604 the children immunised in this cohort would have received the traditional monovalent vaccine

605 (Biovac Paed), whereas children now being immunised in South Africa will have hexavalent  
606 vaccination (HBV/DTP/IPV/Hib, Hexaxim, Sanofi-Pasteur).

607

608 Alternative approaches for HIV-positive subjects, such as supplementing the current  
609 schedule with booster vaccinations and increased vaccine doses have been trialled with  
610 variable results (47). A promising recent study of HIV-positive children found that repeating  
611 the primary course of vaccination subsequent to response to ART generated lasting  
612 protective immune responses (38).

613

614 We present a parsimonious mathematical framework, not including, for instance, the  
615 proportion of the population infected with HIV, which may suffer from increased risk for  
616 vertical transmission and reduced vaccine efficacy. However, we argue that the increasing  
617 proportion of HIV-positive individuals receiving ART should minimize the impact that an HIV  
618 subgroup in the mathematical framework could have on the general dynamics of the model.  
619 In the population studied here, ART has only been introduced in children achieving certain  
620 immunological criteria (as per old treatment guidelines), while in future, infected children will  
621 be started on treatment as soon as diagnosed (potentially at birth), which could be predicted  
622 to increase vaccine responses to similar levels as seen in the HIV-negative population;  
623 further studies will be required to assess this over time. More importantly, the effects of HIV  
624 and ART would be mostly in the absolute values of our projections, but not necessarily on  
625 the obtained differences in terms of impact between the simulated interventions. We also  
626 note that quantifications of time to elimination are problematic in a deterministic model such  
627 as ours, but our primary outcome is not to present a quantitative estimate for time to  
628 elimination, but rather to demonstrate that the predicted time scale is outside the proposed  
629 goals for 2030.

630

### 631 **Conclusions**

632 Our results affirm that the HBV vaccine is successful in reducing the prevalence of HBV in  
633 children, with current rates of <1% in the South African setting we have studied. This  
634 underlines the importance of ongoing immunisation, which is fundamental in preventing  
635 infection in the vulnerable early months of life. However, we also highlight that a small  
636 number of cases of HBV transmission continue, despite inclusion of the HBV vaccine in EPI,  
637 and that a proportion of children (especially those who are HIV-infected) are potentially at  
638 risk of infection as a result of low anti-HBs titres, either as a result of incomplete  
639 immunisation, or because of poor antibody titres following vaccination. Sustained efforts to  
640 vaccinate and boost these children are essential. However, at a population level, although

641 neonatal immunisation is the best single intervention, our model demonstrates that this alone  
642 does not offer a route to elimination. Substantial reduction of population prevalence hinges  
643 on a combination of measures; the crucial roles of catch-up vaccination for older children  
644 and the need for major efforts in PMTCT are highlighted by our model. A meaningful and  
645 sustainable campaign to eliminate this infection also requires concerted efforts and  
646 investment in case finding and treatment, education, reduction of stigma, and sexual and  
647 reproductive health services. Ultimately, the only route to elimination of HBV may be to  
648 develop a cure.  
649

650 **REFERENCES**

651

- 652 1. World Health Organization. Global health sector strategy on viral hepatitis 2016-2021.  
653 2016;<http://www.who.int/hepatitis/strategy2016-2021/ghs>.
- 654 2. World Health Organization. Combating Hepatitis B and C to Reach Elimination by  
655 2030: Advocacy Brief. 2016;<http://apps.who.int/iris/bitstream/10665/206453/1/>.
- 656 3. World Health Organization. Hepatitis B factsheet.  
657 2017;<http://www.who.int/mediacentre/factsheets/fs204/en>.
- 658 4. Schweitzer A, Horn J, Mikolajczyk RT, Krause G, Ott JJ. Estimations of worldwide  
659 prevalence of chronic hepatitis B virus infection: A systematic review of data  
660 published between 1965 and 2013. *The Lancet*. 2015;386:1546–55.
- 661 5. Ott JJJ, Horn J, Krause G, Mikolajczyk RTT. Time trends of chronic HBV infection  
662 over prior decades – A global analysis. *Journal of Hepatology*. 2017;66:48–54.
- 663 6. Matthews PC, Beloukas A, Malik A, Carlson JM, Jooste P, Ogwu A, et al. Prevalence  
664 and characteristics of hepatitis B virus (HBV) coinfection among HIV-Positive women  
665 in South Africa and Botswana. *PLoS ONE*. 2015;10(7):e0134037.
- 666 7. Dibisceglie AM, Kew MC, Dusheiko GM, Berger EL, Song E, Paterson AC, et al.  
667 Prevalence of hepatitis B virus infection among black children in Soweto. *British*  
668 *Medical Journal*. 1986;292:1440–2.
- 669 8. Burnett RJ, Francois G, Kew MC, Leroux-Roels G, Meheus A, Hoosen AA, et al.  
670 Hepatitis B virus and human immunodeficiency virus co-infection in sub-Saharan  
671 Africa: A call for further investigation. *Liver International*. 2005;25(2):201–13.
- 672 9. Burnett RJ, Kramvis A, Dochez C, Meheus A. An update after 16 years of hepatitis B  
673 vaccination in South Africa. *Vaccine*. 2012;30(Supplement 3):C45–51.
- 674 10. Jooste P, van Zyl A, Adland E, Daniels S, Hattingh L, Brits A, et al. Screening,  
675 characterisation and prevention of Hepatitis B virus (HBV) co-infection in HIV-positive  
676 children in South Africa. *Journal of Clinical Virology*. 2016;85:71–4.
- 677 11. Peto TJ, Mendy ME, Lowe Y, Webb EL, Whittle HC, Hall AJ. Efficacy and  
678 effectiveness of infant vaccination against chronic hepatitis B in the Gambia Hepatitis  
679 Intervention Study (1986–90) and in the nationwide immunisation program. *BMC*  
680 *Infectious Diseases*. 2014;14(7).
- 681 12. McMahon BJ, Helminiak C, Wainwright RB, Bulkow L, Trimble BA, Wainwright K.  
682 Frequency of adverse reactions to hepatitis B vaccine in 43,618 persons. *The*  
683 *American Journal of Medicine*. 1992 Mar;92(3):254–6.
- 684 13. Floreani A, Baldo V, Cristofolletti M, Renzulli G, Valeri A, Zanetti C, et al. Long-term  
685 persistence of anti-HBs after vaccination against HBV: An 18 year experience in  
686 health care workers. *Vaccine*. 2004;22:607–10.

- 687 14. Bialek SR, Bower W a, Novak R, Helgenberger L, Auerbach SB, Williams IT, et al.  
688 Persistence of protection against hepatitis B virus infection among adolescents  
689 vaccinated with recombinant hepatitis B vaccine beginning at birth: a 15-year follow-  
690 up study. *The Pediatric Infectious Disease Journal*. 2008;27(10):881–5.
- 691 15. Van Damme P, Kane M, Meheus A. Integration of hepatitis B vaccination into national  
692 immunisation programmes. *BMJ*. 1997;314:1033–6.
- 693 16. World Health Organization. Preventing Perinatal Hepatitis B Virus Transmission□: A  
694 Guide for Introducing and Strengthening Hepatitis B Birth Dose Vaccination. 2015.
- 695 17. Gentile I, Borgia G. Vertical transmission of hepatitis B virus□: challenges and  
696 solutions. *International journal of Women's Health*. 2014;4(6):605–11.
- 697 18. World Health Organization. Conference Report, Hepatitis B Vaccines: WHO Position  
698 Paper - Recommendations. *Vaccine*. 2010;28:589–90.
- 699 19. Chotun N, Nel E, Cotton MF, Preiser W, Andersson Ml. Hepatitis B virus infection in  
700 HIV-exposed infants in the Western Cape, South Africa. *Vaccine*. 2015;33(36):4618–  
701 22.
- 702 20. Statistics South Africa. Mid-year population estimates.  
703 2016;<https://www.statssa.gov.za/publications/P0302/P030>.
- 704 21. Matthews PC, Geretti AM, Goulder PJR, Klenerman P. Epidemiology and impact of  
705 HIV coinfection with Hepatitis B and Hepatitis C viruses in Sub-Saharan Africa.  
706 *Journal of Clinical Virology*. 2014;61:20–33.
- 707 22. Beghin J-C, Ruelle J, Sokal E, Bachy A, Krishna M, Hall L, et al. Effectiveness of the  
708 South African Expanded Program of Immunization Against Hepatitis B in Children  
709 Infected With Human Immunodeficiency Virus-1 Living in a Resource-Limited Setting  
710 of Kwazulu-Natal. *Journal of Medical Virology*. 2017;89:182–5.
- 711 23. Siriaksorn S, Puthanakit T, Sirisanthana T, Sirisanthana V. Prevalence of protective  
712 antibody against hepatitis B virus in HIV-infected children with immune recovery after  
713 highly active antiretroviral therapy. *Vaccine*. 2006;24(16):3095–9.
- 714 24. Pippi F, Bracciale L, Stolzuoli L, Giaccherini R, Montomoli E, Gentile C, et al.  
715 Serological response to hepatitis B virus vaccine in HIV-infected children in Tanzania.  
716 *HIV Medicine*. 2008;9(7):519–25.
- 717 25. Hashim A, Dang V, Bolotin S, Crowcroft NS. How and why researchers use the  
718 number needed to vaccinate to inform decision making-A systematic review. *Vaccine*.  
719 2015;33(6):753–8.
- 720 26. Kelly H, Attia J, Andrews R, Heller RF. The number needed to vaccinate (NNV) and  
721 population extensions of the NNV: Comparison of influenza and pneumococcal  
722 vaccine programmes for people aged 65 years and over. *Vaccine*. 2004;22(17–  
723 18):2192–8.

- 724 27. Nayagam S, Thursz M, Sicuri E, Conteh L, Wiktor S, Low-Beer D, et al. Requirements  
725 for global elimination of hepatitis B: a modelling study. *The Lancet Infectious*  
726 *Diseases*. 2016;16(12):1399–408.
- 727 28. Sharp CP, Gregory WF, Hattingh L, Malik A, Adland E, Daniels S, et al. PARV4  
728 prevalence, phylogeny, immunology and coinfection with HIV, HBV and HCV in a  
729 multicentre African cohort. *Wellcome Open Research*. 2017;2(0):26.
- 730 29. Public Health England. Hepatitis B. In: *Green Book: Immunisation against infectious*  
731 *disease*. 2016. p. 161–85.
- 732 30. Jack A, Hall A, Maine N, Mendy M, Whittle H. What level of hepatitis B antibody is  
733 protective? *The Journal of Infectious Diseases*. 1999;179:489–92.
- 734 31. Hadler SC, Francis DP, Maynard JE, Thompson SE, Judson FN, Echenberg dean F,  
735 et al. Long-term Immunogenicity and Efficacy of Hepatitis B Vaccine in Homosexual  
736 Men. *New England Journal of Medicine*. 1986;315(4):209–14.
- 737 32. Amponsah-dacosta E, Lebelo RL, Rakgole JN, Burnett RJ, Selabe SG, Mphahlele  
738 MJ. Evidence for a Change in the Epidemiology of Hepatitis B Virus Infection After  
739 Nearly Two Decades of Universal Hepatitis B Vaccination in South Africa. *Journal of*  
740 *Medical Virology*. 2014;924:918–24.
- 741 33. Healy S a, Gupta S, Melvin AJ. HIV/HBV coinfection in children and antiviral therapy.  
742 *Expert review of anti-infective therapy*. 2013;11(3):251–63.
- 743 34. Andersson MI, Maponga TG, Ijaz S, Barnes J, Theron GB, Meredith SA, et al. The  
744 epidemiology of hepatitis B virus infection in HIV-infected and HIV-uninfected  
745 pregnant women in the Western Cape, South Africa. *Vaccine*. 2013;31(47):5579–84.
- 746 35. Klingler C, Thoumi AI, Mrithinjayam VS. Cost-effectiveness analysis of an additional  
747 birth dose of Hepatitis B vaccine to prevent perinatal transmission in a medical setting  
748 in Mozambique. *Vaccine*. 2012;31:252–9.
- 749 36. Lee C, Gong Y, Brok J, Boxall EH, Gluud C, Eh B, et al. Hepatitis B immunisation for  
750 newborn infants of hepatitis B surface antigen-positive mothers (Review). *Cochrane*  
751 *Database of Systematic Reviews*. 2006;(2).
- 752 37. Sokal EM, Paganelli M, Wirth S, Socha P, Vajro P, Lacaille F, et al. Management of  
753 chronic hepatitis B in childhood: ESPGHAN clinical practice guidelines: Consensus of  
754 an expert panel on behalf of the European Society of Pediatric Gastroenterology,  
755 Hepatology and Nutrition. *Journal of Hepatology*. 2013;59(4):814–29.
- 756 38. Lao-araya M, Puthanakit T, Aurpibul L, Taecharoenkul S, Sirisanthana T, Sirisanthana  
757 V. Prevalence of protective level of hepatitis B antibody 3 years after revaccination in  
758 HIV-infected children on antiretroviral therapy. *Vaccine*. 2011;29(23):3977–81.
- 759 39. Büchner A, Omar FE, Vermeulen J, Reynders DT. Investigating hepatitis B immunity  
760 in patients presenting to a Paediatric Haematology and oncology unit in South Africa.

- 761 South African Medical Journal. 2014;104(9):628–31.
- 762 40. Mayaphi SH, Rossouw TM, Masemola DP, Olorunju S a S, Mphahlele MJ, Martin DJ.  
763 HBV/HIV co-infection□: The dynamics of HBV in South African patients with AIDS.  
764 South African Medical Journal. 2012;102(3):157–62.
- 765 41. Ndirangu J, Barnighausen T, Tanser F, Tint K, Newell M. Levels of childhood  
766 vaccination coverage and the impact of maternal HIV status on child vaccination  
767 status in rural Kwazulu-Natal, South Africa. *Tropical Medicine and International*  
768 *Health*. 2009;14(11):1383–93.
- 769 42. Banatvala J, Van Damme P, Oehen S. Lifelong protection against hepatitis B: The  
770 role of vaccine immunogenicity in immune memory. *Vaccine*. 2000;19(7–8):877–85.
- 771 43. Lao-araya M, Puthanakit T, Aурpibul L, Sirisanthana T, Sirisanthana V. Antibody  
772 response to hepatitis B re-vaccination in HIV-infected children with immune recovery  
773 on highly active antiretroviral therapy. *Vaccine*. 2007;25(29):5324–9.
- 774 44. Abzug MJ, Warshaw MG, Rosenblatt HM, Levin MJ, Nachman S, Pelton SI, et al.  
775 Immunogenicity and immunologic memory after hepatitis B virus booster vaccination  
776 in HIV-infected children receiving highly active antiretroviral therapy. *The Journal of*  
777 *Infectious Diseases*. 2009;200(6):935–46.
- 778 45. Kim HN, Harrington RD, Van Rompaey SE, Kitahata MM. Independent clinical  
779 predictors of impaired response to hepatitis B vaccination in HIV-infected persons.  
780 *International journal of STD & AIDS*. 2008;19(9):600–4.
- 781 46. Mori M, Adland E, Paioni P, Swordy A, Mori L, Laker L, et al. Sex Differences in  
782 Antiretroviral Therapy Initiation in Pediatric HIV Infection. *PloS one*.  
783 2015;10(7):e0131591.
- 784 47. Catherine F-X, Piroth L. Hepatitis B virus vaccination in HIV-infected people: a review.  
785 *Human Vaccines & Immunotherapeutics*. 2017;DOI:  
786 10.1080/21645515.2016.1277844.
- 787 48. World Health Organization. Consolidated guidelines on the use of antiretroviral drugs  
788 for treating and preventing HIV infection: recommendations for a public health  
789 approach. World Health Organization.  
790 2016;<http://apps.who.int/iris/bitstream/10665/208825/1/>.
- 791 49. Medley GF, Lindop NA, Edmunds WJ, Nokes DJ. Hepatitis-B virus endemicity:  
792 heterogeneity, catastrophic dynamics and control. *Nature Medicine*. 2001;7(5):619–  
793 24.
- 794 50. Kurupati RK, Kossenkoff A, Kannan S, Haut LH, Doyle S, Yin X, et al. The effect of  
795 timing of influenza vaccination and sample collection on antibody titers and responses  
796 in the aged. *Vaccine*. 2017;35(30):3700–8.
- 797 51. Karabay O, Temel A, Koker AG, Tokel M, Ceyhan M, Kocoglu E. Influence of



798 circadian rhythm on the efficacy of the hepatitis B vaccination. Vol. 26, Vaccine.  
799 Netherlands; 2008. p. 1143–4.

800

## 801 **FIGURE LEGENDS**

### 802 **Figure 1. Diagram of HBV transmission model and predicted impact dynamics of** 803 **single interventions on population prevalence of infection.**

804 A: HBV transmission model, showing population groups who are susceptible (S; divided into  
805 infants (i), children (c) and adults (a)), Chronically infected (C; divided into eAg-positive C+  
806 and eAg-negative C-), acutely infected (I), recovered (R) and vaccinated (V), and the  
807 transitions between these groups. Further details of the model including all parameters are  
808 available in suppl data 2. B: Dynamics of total HBV prevalence based on vaccination of  
809 newborns (starting at  $t=0$ ), with proportion vaccinated designated as  $\delta n$  (where  $\delta n=1$  is  
810 equivalent to an intervention that covers 100% of newborns). C: Dynamics of total HBV  
811 prevalence, based on implementing an intervention that prevents mother to child  
812 transmission (PMTCT, starting at  $t=0$ ) by a proportion represented by parameter  $\zeta$  ( $\zeta=1$  is  
813 equivalent to averting 100% of possible transmission events). Parameters as in Table S1 of  
814 Suppl. data file 2.

815

### 816 **Figure 2: Hepatitis B surface antibody (anti-HBs) titres mediated by vaccination in** 817 **HIV-positive (HIV+) and HIV-negative (HIV-) children aged 6-60 months in Kimberley,** 818 **South Africa.**

819 A: Scatter plot representing vaccine-mediated antibody titres, indicating median and  
820 interquartile ranges, for HIV-positive and HIV-negative children (p-value by Mann Whitney U  
821 test). B: Proportion of HIV-positive and HIV-negative children with anti-HBs  $\geq 10$  mIU/ml (p-  
822 value by Fisher's Exact Test). C: Proportion of HIV-positive and HIV-negative children with  
823 anti-HBs  $\geq 100$  mIU/ml (p-value by Fisher's Exact Test).

824

### 825 **Figure 3: Relationship between age and vaccine-mediated Hepatitis B surface** 826 **antibody (anti-HBs) titres in HIV-positive and HIV-negative children in Kimberley,** 827 **South Africa.**

828 A, B: Ages of children attaining anti-HBs titres  $\geq 100$  mIU/ml for HIV-positive (panel A) and  
829 HIV-negative children (panel B) in cohort age 6-60 months. Median ages, interquartile  
830 ranges and p-values by Mann-Whitney U test are indicated. C, D: Relationship between age  
831 and vaccine-mediated Ab titre among HIV-positive children including those age 6-60 months  
832 and an older cohort age  $>60$  months (range 64-193 months; see table 3). P-value by Mann  
833 Whitney U test (panel C) and by Spearman's rank correlation test (panel D). E: Anti-HBs titre  
834 for HIV-positive and HIV-negative children according to age. Each point represents the mean

835 titre for the group of children aged  $\leq 12$  months (1 yr), 13-24 months (2 yrs), 25-36 months (3  
836 yrs), 37-48 months (4 yrs), 49-60 months (5 years).

837

838 **Figure 4. Odds ratios for protective response to HBV vaccination in children age 6-60**  
839 **months in Kimberley, South Africa.**

840 Odds ratios are shown for Anti-HBs titre  $< 10$  mIU/ml and  $< 100$  mIU/ml in the whole cohort  
841 (grey) and in HIV-positive children (black). Statistically significant OR are denoted \* and  
842 significant p-values are indicated in bold.

843

844 **Figure 5. Impact of combined interventions on HBV prevalence and time to**  
845 **elimination.**

846 A1-3: time to elimination of HBV based on a threshold of 1 carrier per 1000 individuals in the  
847 population. B1-3: Reduction of total HBV prevalence for 25 years after the start of  
848 interventions. C1-3: Reduction of total HBV prevalence for 50 years after the start of  
849 interventions. D1-3: Reduction in HBeAg+ carriers (model class 'C+') for 25 years after the  
850 start of interventions. A/B/C/D: In all cases, the x-axis shows the proportion of neonates  
851 vaccinated. Top row: neonatal vaccination combined with routine vaccination at older ages  
852 ( $> 6$  years old, y-axis). Middle row: neonatal vaccination combined with reduction in vertical  
853 transmission (PMTCT, y-axis). Bottom row: neonatal vaccination combined with reduction in  
854 vertical transmission (PMTCT, y-axis) after a catch-up campaign covering 100% of the  
855 susceptible population. Dashed lines are visual references for 70%, 80% and 90% of the  
856 respective interventions. Parameters as in Table S1 of supplementary data file 2.

857

## 858 **SUPPLEMENTARY DATA LEGENDS**

859

860 **Suppl data 1.** Metadata for three paediatric cohorts recruited in Kimberley, South Africa,  
861 including longitudinal CD4+ T cell and viral load data for paediatric HIV cohort age  $\leq 60$   
862 months in Kimberley, South Africa.

863

864 **Suppl data 2.** Variables used to inform a population-based model of HBV transmission and  
865 prevention, with supporting references and a complete methods description for model of  
866 HBV transmission and prevention.

867

868

869

870 **ACKNOWLEDGEMENTS**

871 Nil

872

873 **CONFLICTS OF INTEREST**

874 None to declare

875

876 **FUNDING**

877 PCM, PK and PJRG are funded by the Wellcome Trust (grant numbers 110110/Z/15/Z to  
878 PM, 109965MA to PK, and 104748MA to PJRG); <https://wellcome.ac.uk>. Recruitment and  
879 serological testing of the KReC cohort was covered by a project grant awarded to PCM from  
880 the Rosetrees Trust <http://www.rosetreestrust.co.uk/>. SG and JL received funding from the  
881 European Research Council under the European Union's Seventh Framework Programme  
882 (FP7/2007-2013)/ERC grant agreement no. 268904-DIVERSITY <https://erc.europa.eu/>. PK  
883 is also funded by an NIHR Senior Fellowship <https://www.nihr.ac.uk/>. The funders had no  
884 role in study design, data collection and analysis, decision to publish, or preparation of the  
885 manuscript.

886

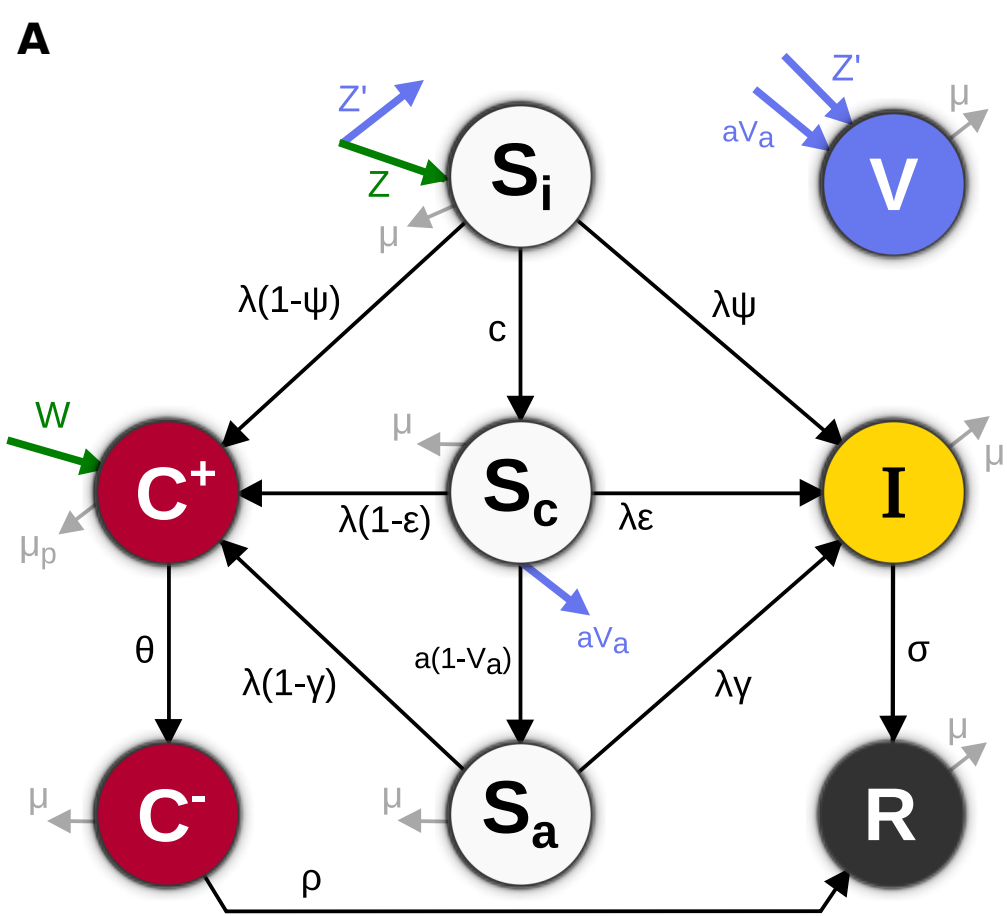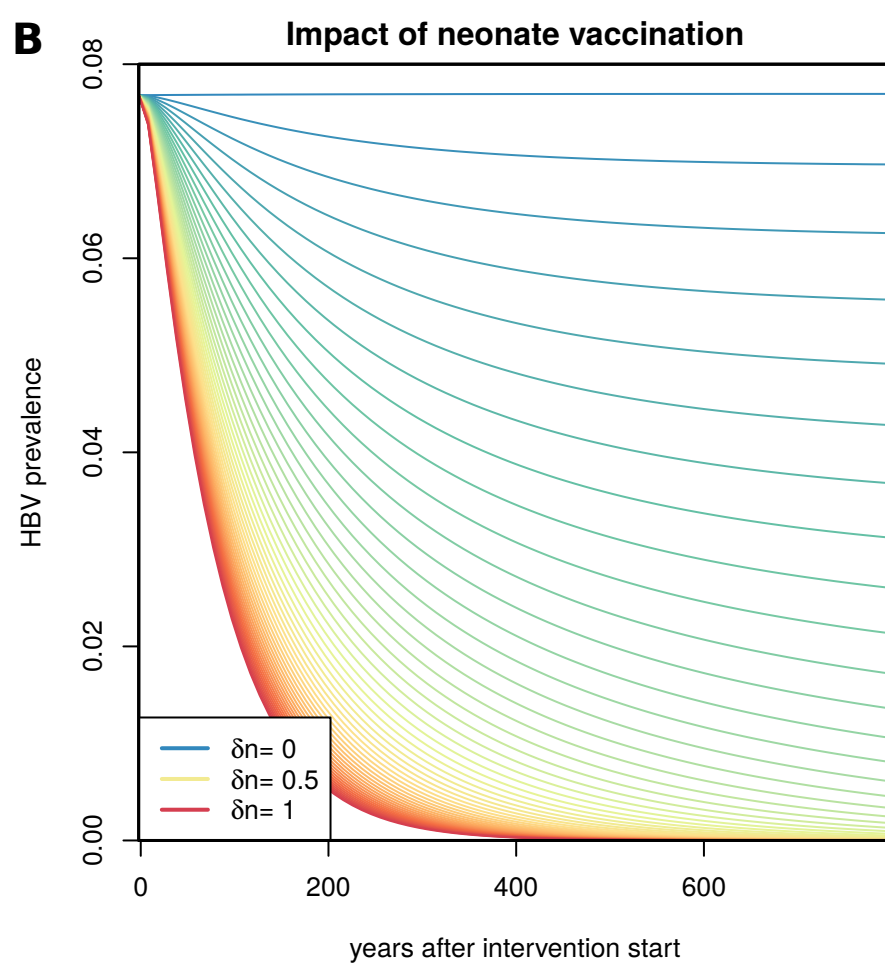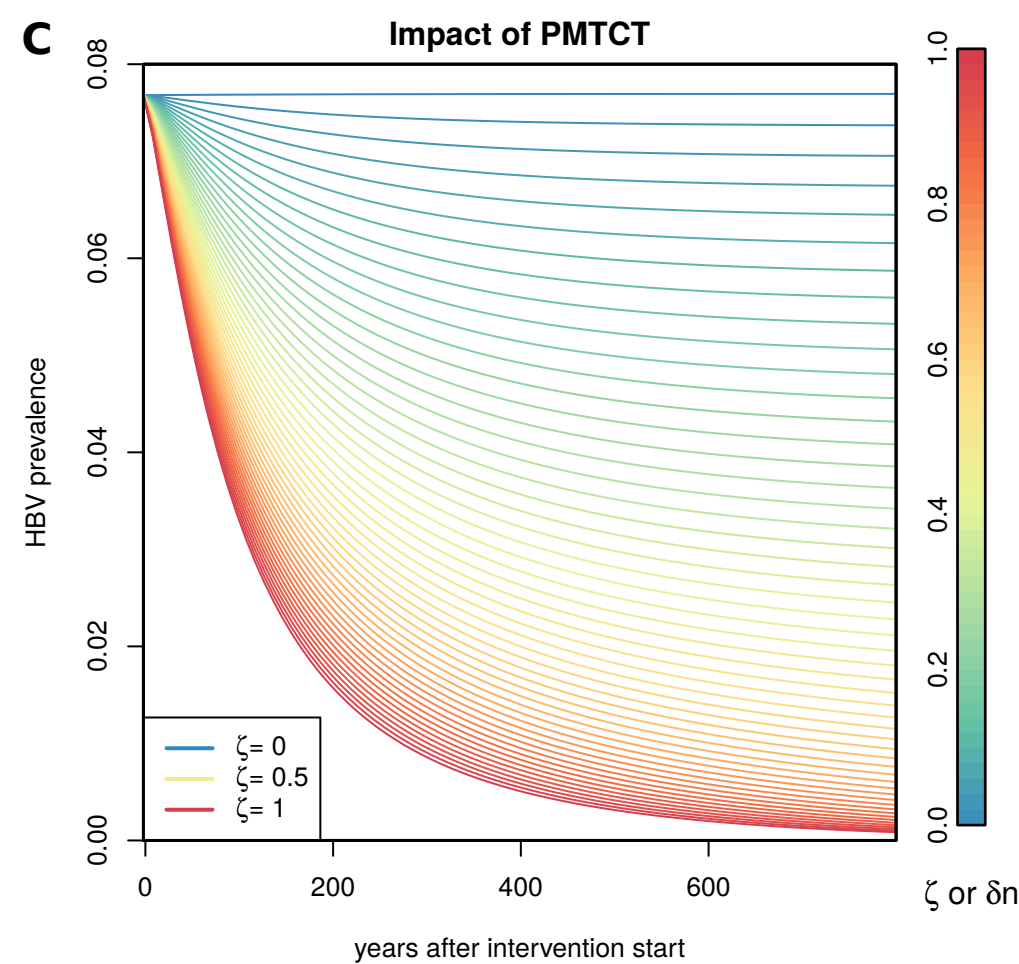

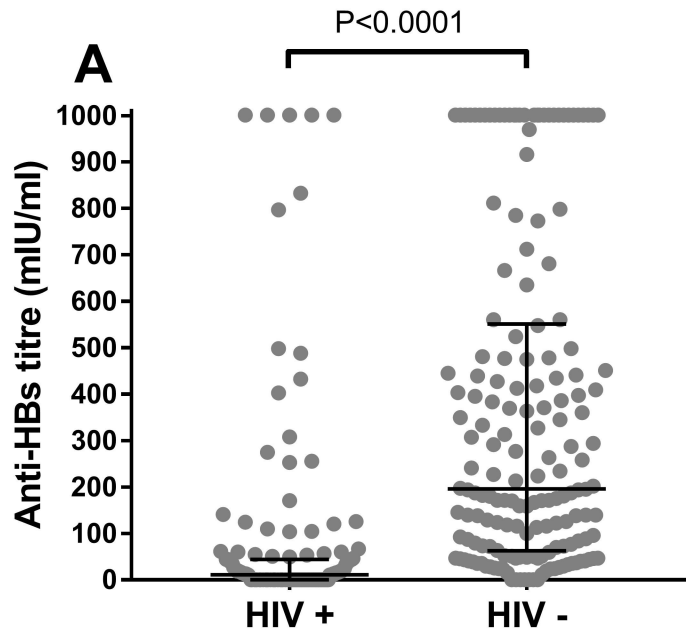

|                    |                     |
|--------------------|---------------------|
| n = 136            | n = 174             |
| Median titre       | Median titre        |
| <b>11.1 mIU/ml</b> | <b>196.1 mIU/ml</b> |

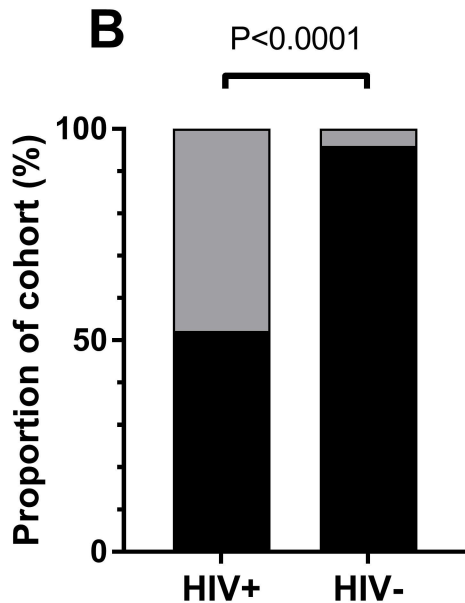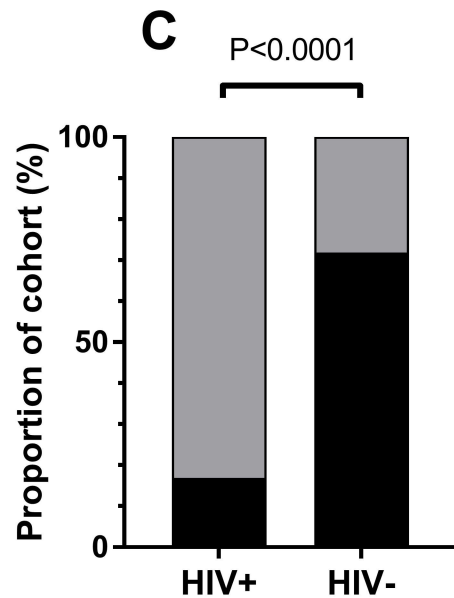

■ Vaccine response  
 ■ No vaccine response

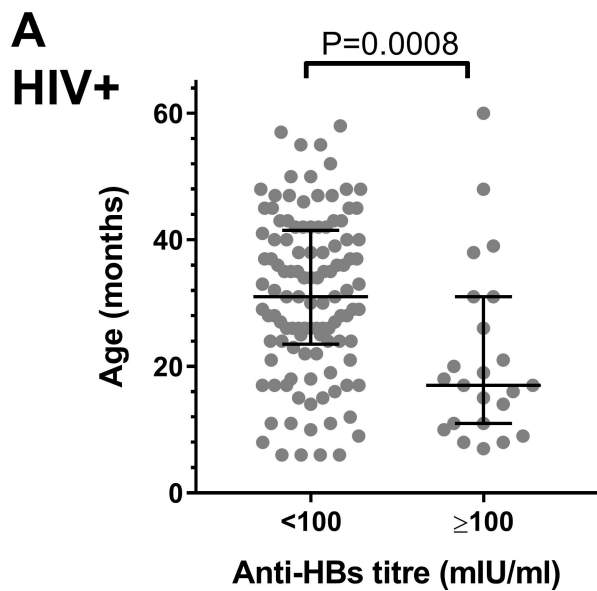

|                  |                  |
|------------------|------------------|
| n=113            | n=23             |
| Median age       | Median age       |
| <b>31 months</b> | <b>17 months</b> |

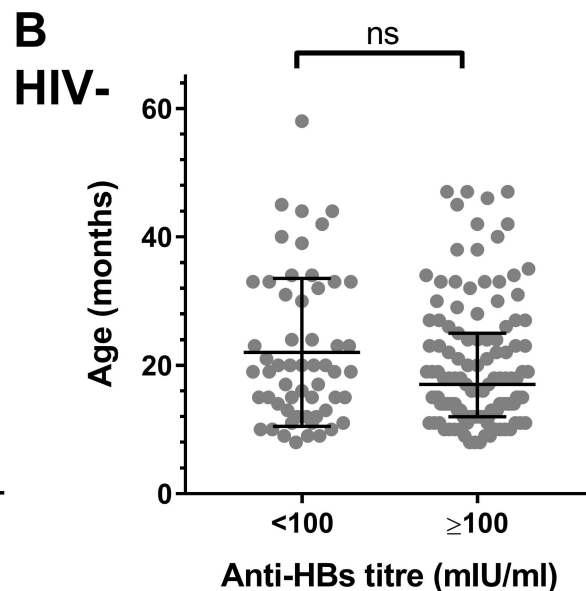

|                  |                  |
|------------------|------------------|
| n=56             | n=119            |
| Median age       | Median age       |
| <b>19 months</b> | <b>17 months</b> |

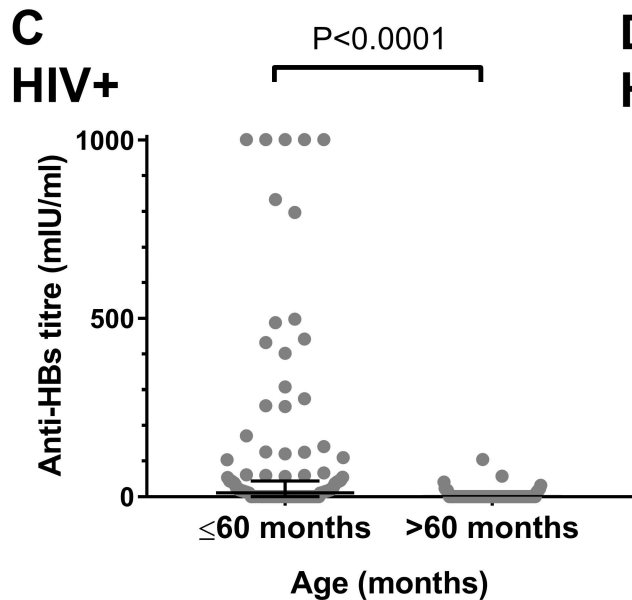

|                    |                      |
|--------------------|----------------------|
| n=136              | n=93                 |
| Median titre       | Median titre         |
| <b>11.1 mIU/ml</b> | <b>&lt;10 mIU/ml</b> |

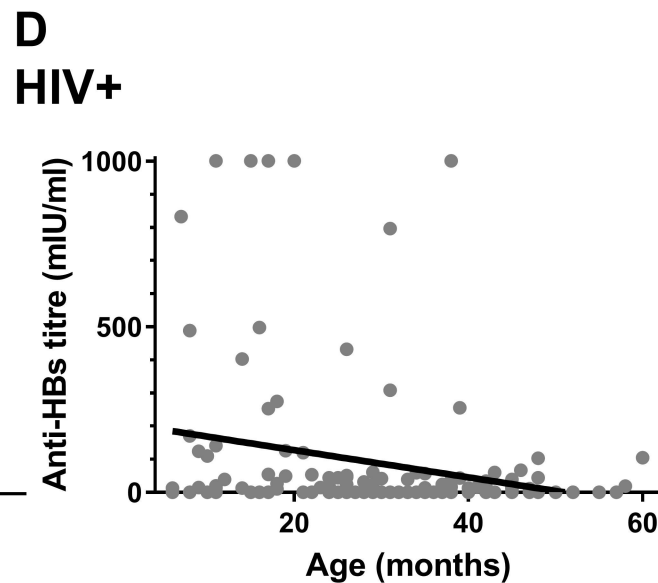

|            |
|------------|
| n=136      |
| $R^2=0.06$ |
| $P=0.004$  |

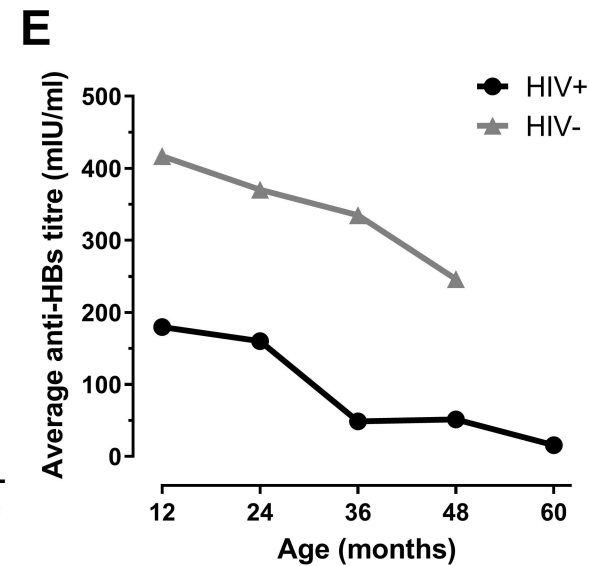

**A**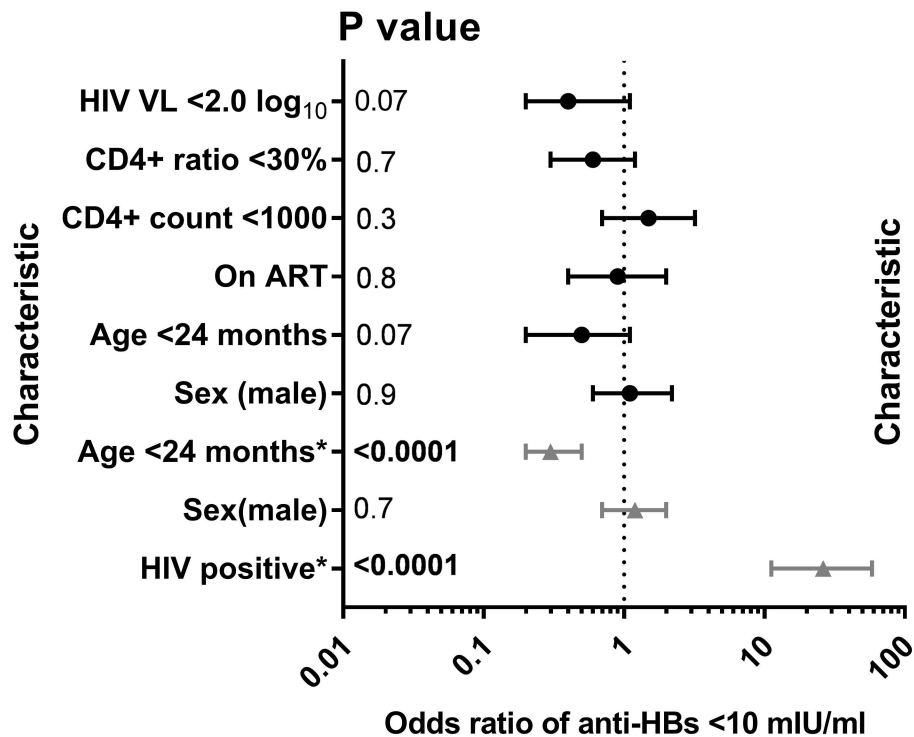**B**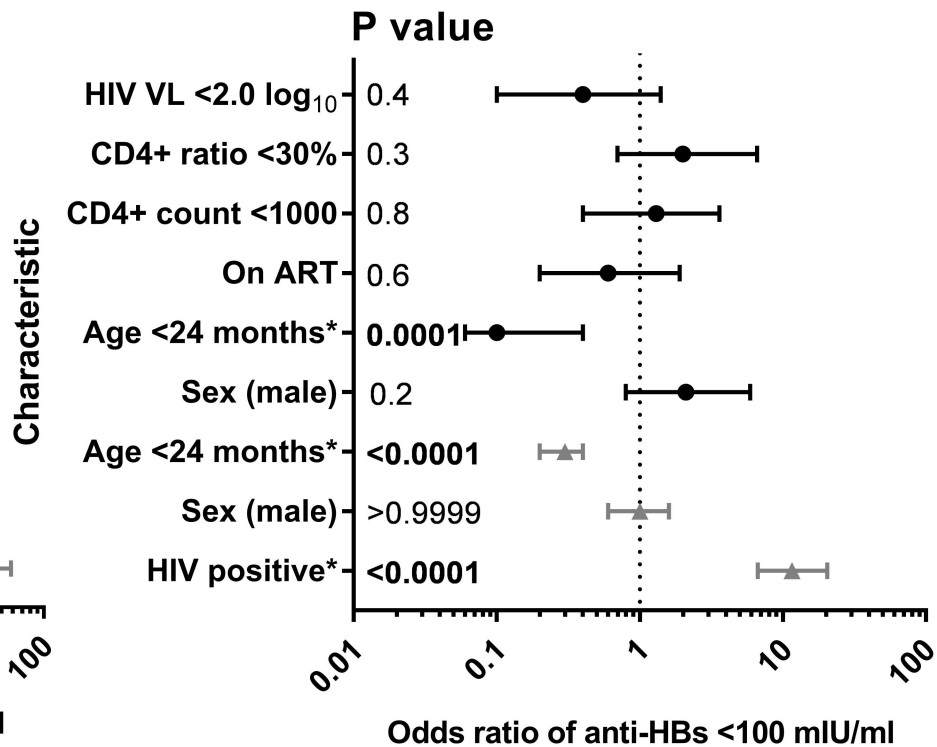

HIV-positive subjects ≤ 60 months ●

All subjects ≤ 60 months ▲

**YEARS FOR HBV PREVALENCE TO REACH 1 IN 1000 INDIVIDUALS IN POST-VACCINATION ERA**

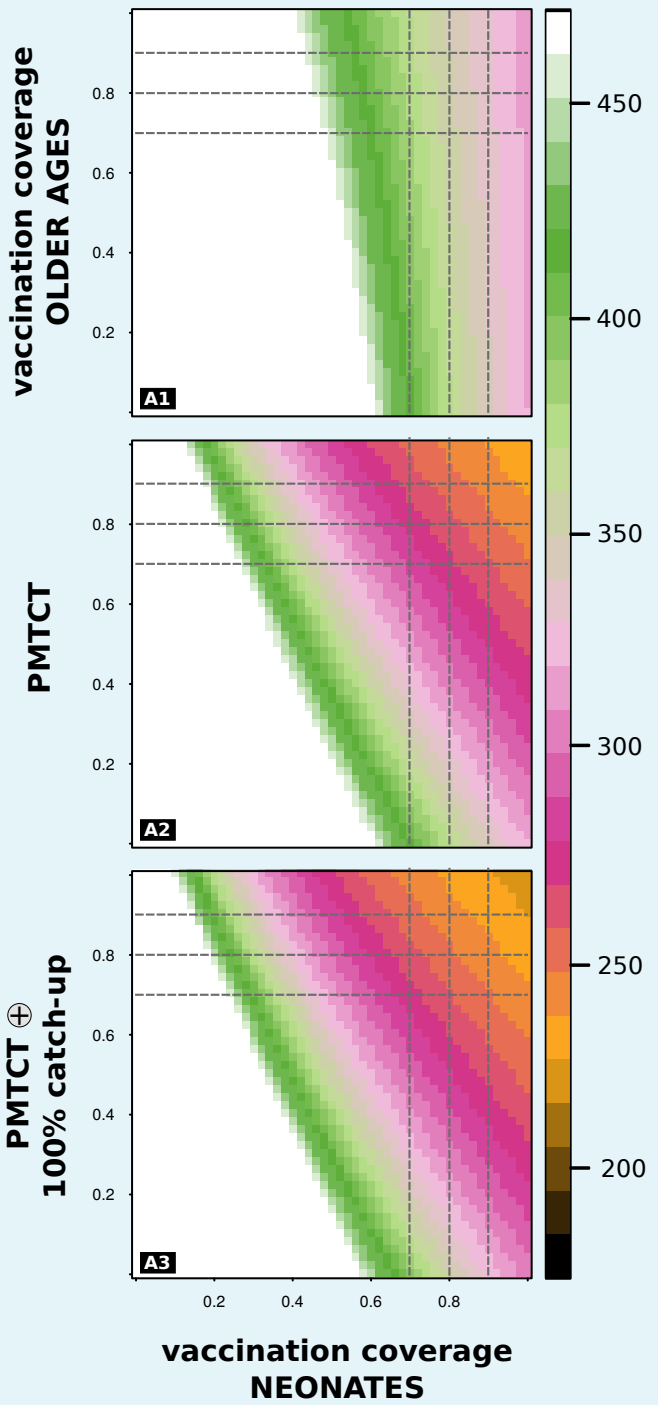

**REDUCTION IN HBV PREVALENCE RELATIVE TO PRE-VACCINATION ERA**

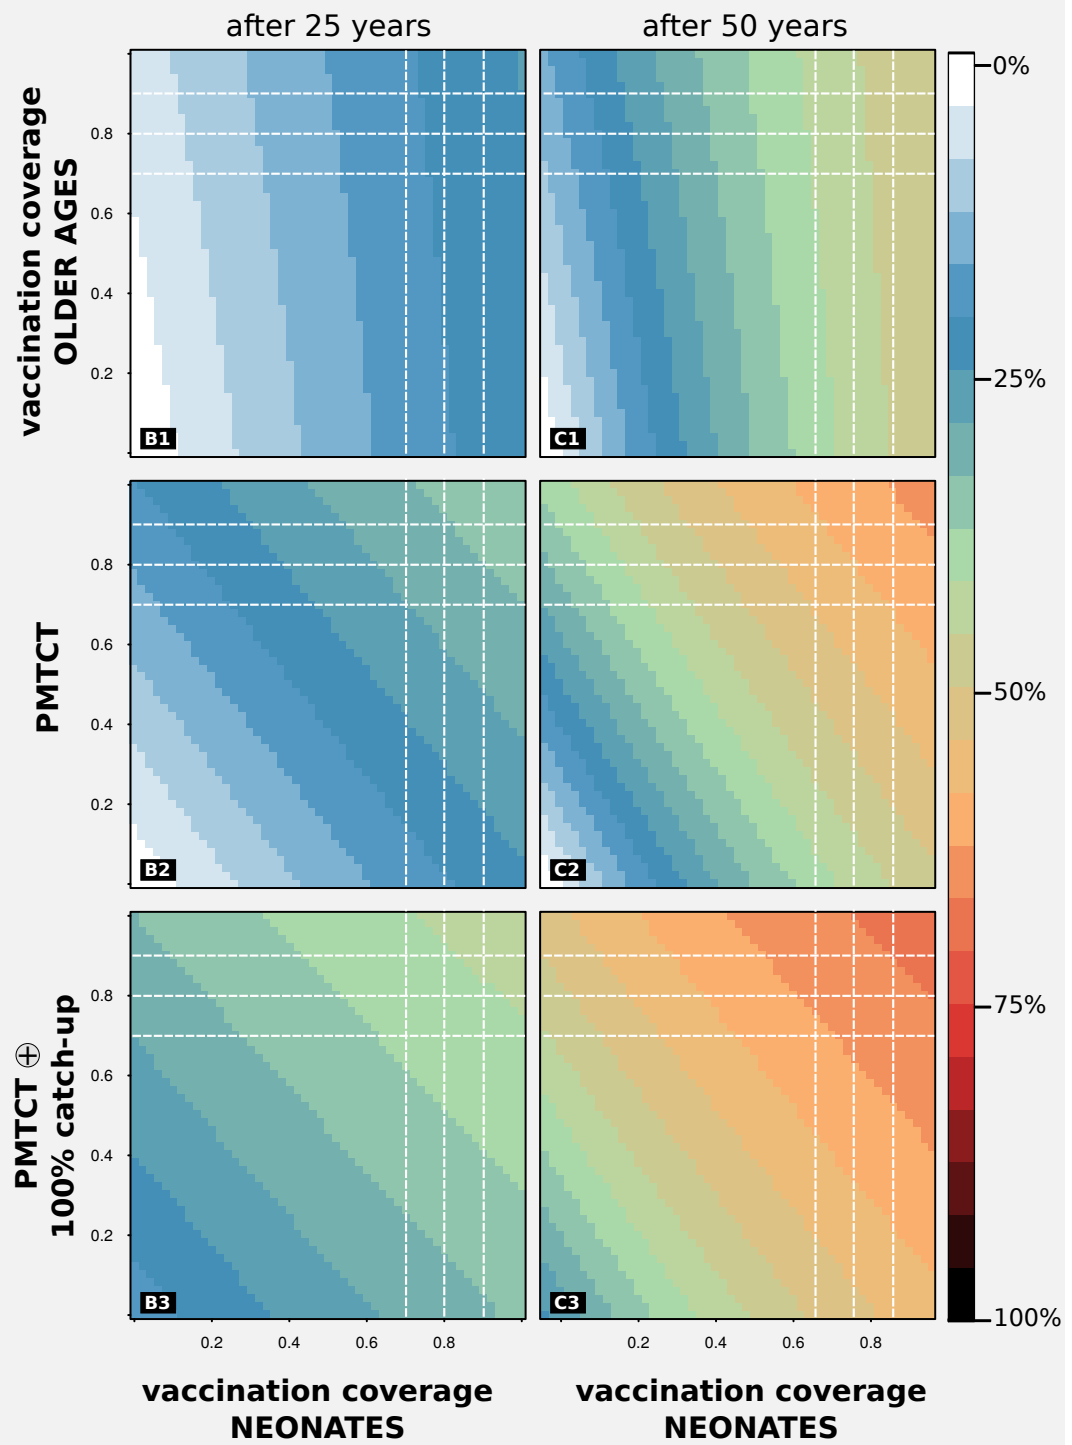

**REDUCTION IN HBeAg+ PREVALENCE RELATIVE TO PRE-VACCINATION ERA**

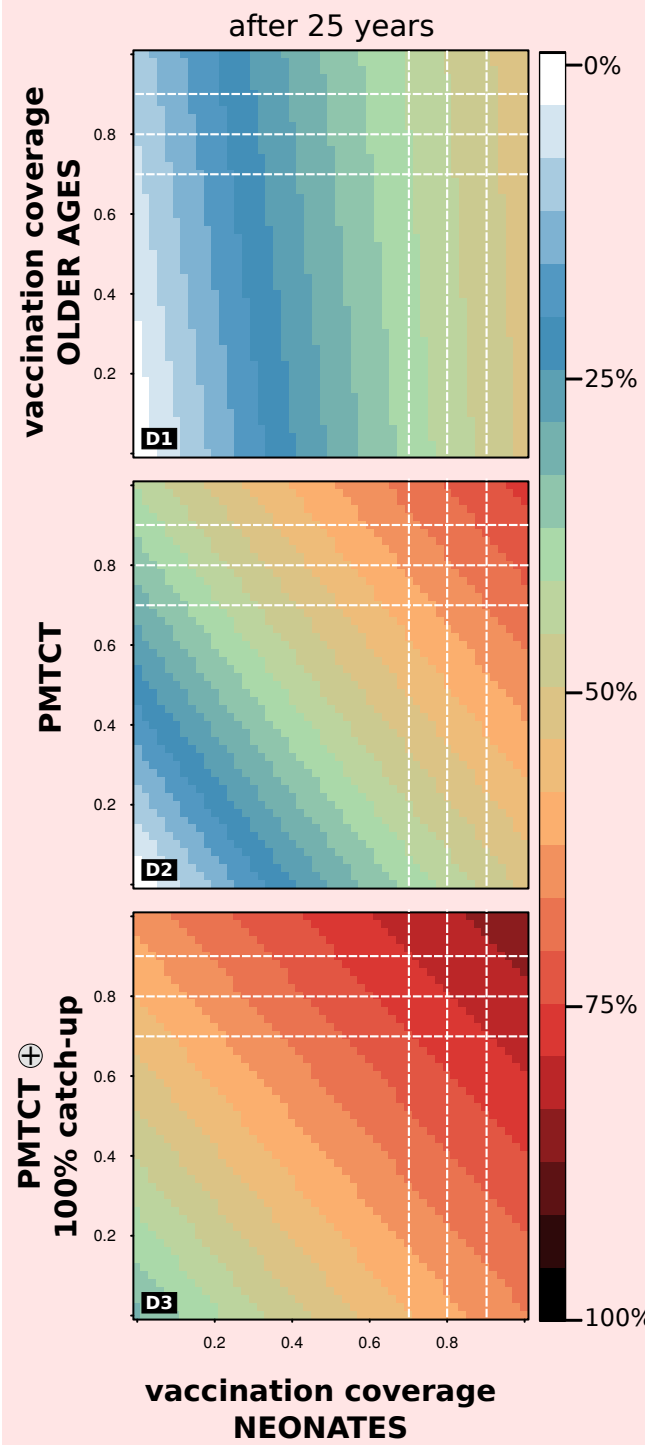

Source: https://www.biorxiv.org/content/biorxiv/early/2017/07/12/162594.full.pdf
